# Supplementary material for: (De)stabilization of Alpha-Synuclein Fibrillary Aggregation by Charged and Uncharged Surfactants
Source: MDPI journal article supplement (doi:10.3390/ijms222212509), 2021-11-19

## Supporting Information

(De)stabilization of alpha-synuclein fibrillary aggregation by charged and uncharged surfactants

Joana A. Loureiro, Stéphanie Andrade, Lies Goderis, Ruben Gomez-Gutierrez, Claudio Soto, Rodrigo Morales, Maria Carmo Pereira

**Figure S1:** Surface tension of in function of the surfactant concentrations of sodium dodecylsulfate (SDS), cetyltrimethylammonium chloride (CTAC) and octyl  $\beta$ -D-glucopyranoside (OG) in the absence or presence of  $\alpha$ -synuclein (25  $\mu$ M) in phosphate buffer (pH 7.4) at 21  $^{\circ}$ C.

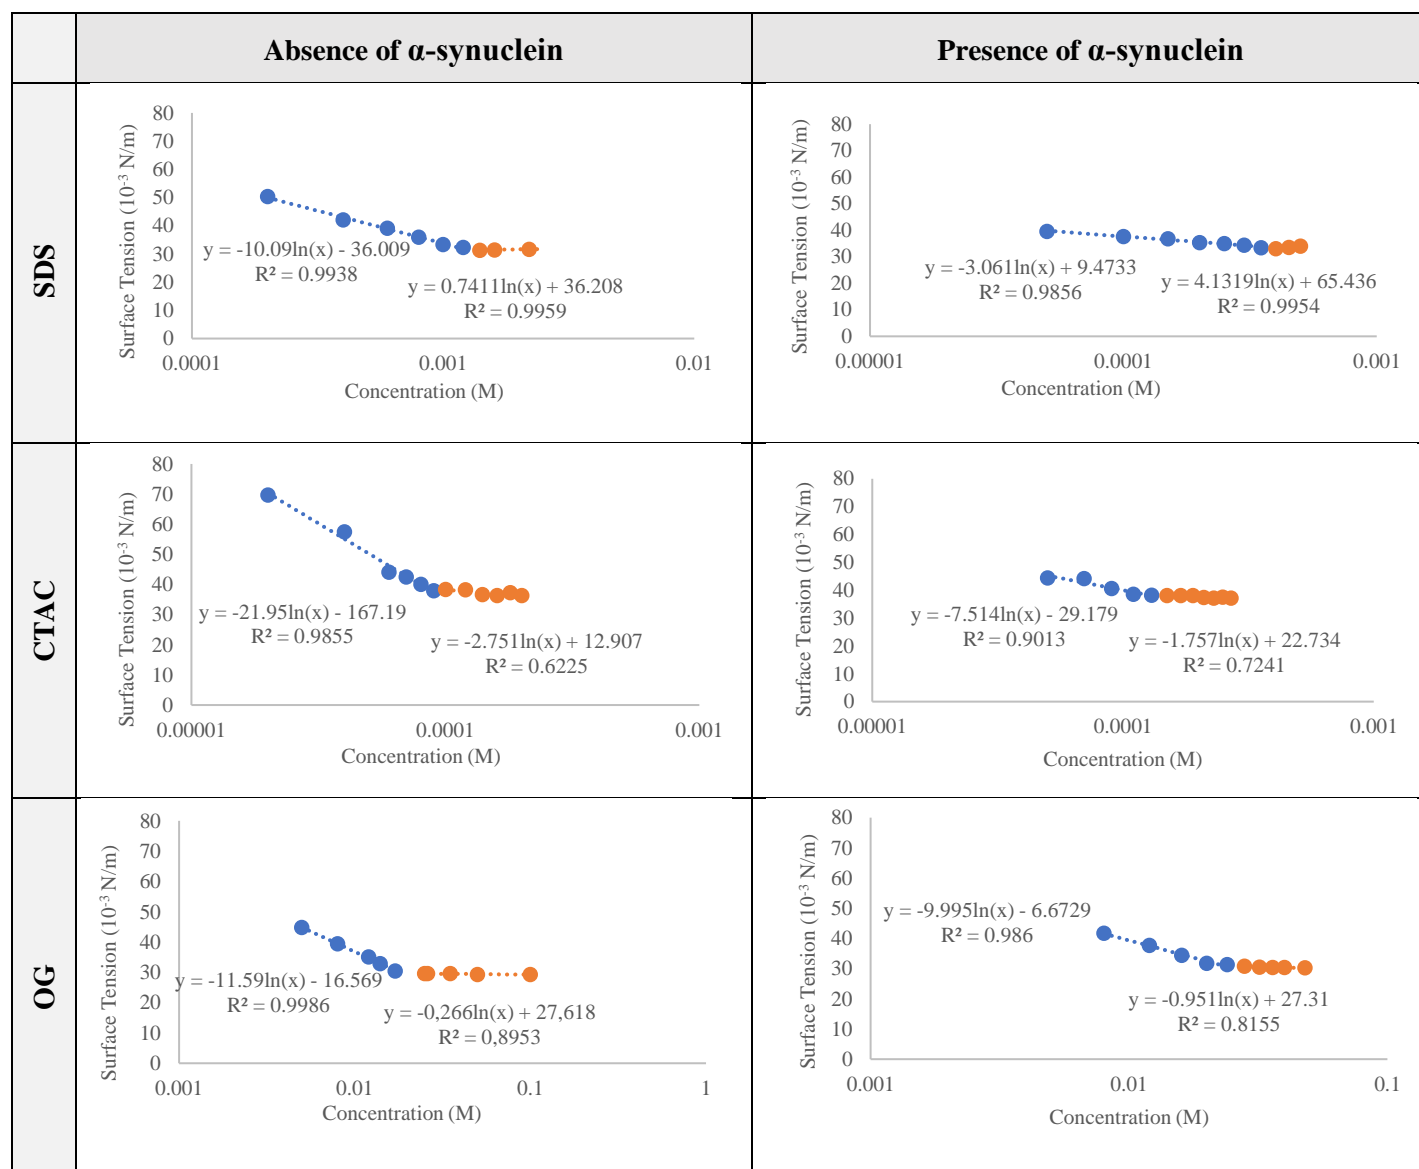

Supplement: s1 [file s1]
